# Supplementary material for: Rayleigh-instability-driven morphology transformation of electrospun polymer fibers imaged by in situ optical microscopy and stimulated Raman scattering microscopy
Source: Royal Society of Chemistry journal article supplement (doi:10.1039/c4ra06228k), 2014-01-01
Supplement: c4ra06228k1.pdf [file c4ra06228k1.pdf]

## Supporting Information

# Rayleigh-Instability-Driven Morphology Transformation of Electrospun Polymer Fibers Imaged by in Situ Optical Microscopy and Stimulated Raman Scattering Microscopy

Ting-Hsien Lee, Yu-Jing Chiu, Yu-Cheng Lai, Ping-Wen Fan, Tyng-Yow Kuo, Ian  
Liau,\* and Jiun-Tai Chen\*

Department of Applied Chemistry, National Chiao Tung University, Hsinchu, Taiwan 30050

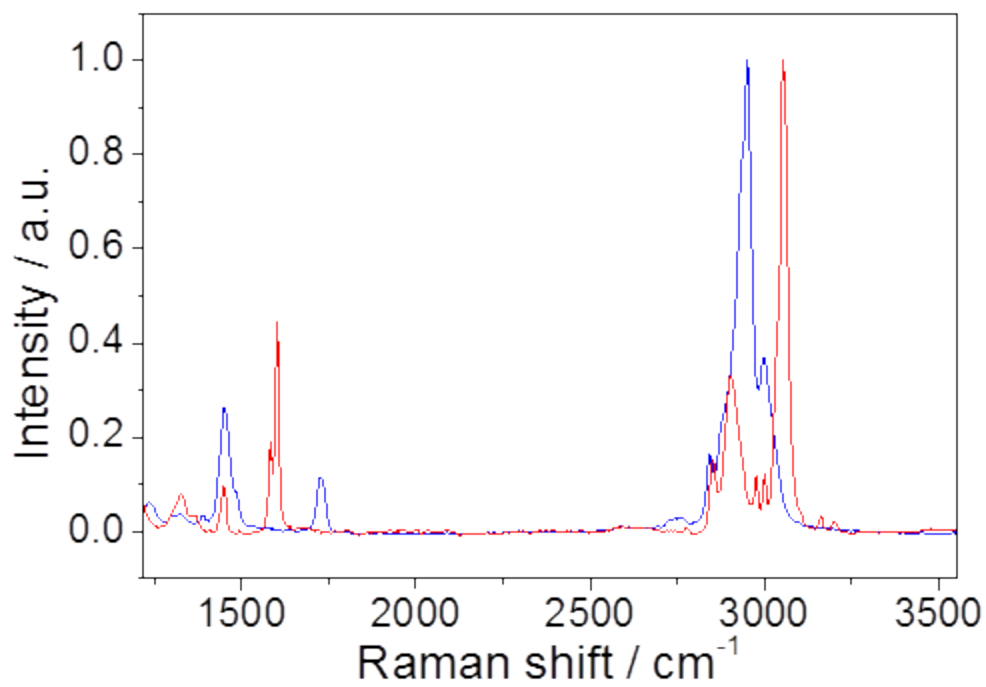

**Figure S1.** Raman spectra of PS (red curve) and PMMA (blue curve).
